# Supplementary material for: Surface Transformation of Spin-on-Carbon Film via Forming Carbon Iron Complex for Remarkably Enhanced Polishing Rate
Source: MDPI journal article supplement (doi:10.3390/nano12060969), 2022-03-15
Supplement: s1 [file s1]

# Surface Transformation of Spin-On-Carbon Film via Forming Carbon Iron Complex for Remarkably Enhanced Polishing Rate

Jun-Myeong Lee <sup>1</sup>, Jong-Chan Lee <sup>1</sup>, Seong-In Kim <sup>1</sup>, Seung-Jae Lee <sup>2</sup>, Jae-Yung Bae <sup>3</sup>, Jin-Hyung Park <sup>4</sup> and Jea-Gun Park <sup>1,2,\*</sup>

<sup>1</sup> Department of Nanoscale Semiconductor Engineering, Hanyang University, Seoul 04763, Korea; kjunom200@naver.com (J.-M.L.); student.jongchan@gmail.com (J.-C.L.); rlatjddls25805@naver.com (S.-I.K.)

<sup>2</sup> Department of Electronic Engineering, Hanyang University, Seoul 04763, Korea; ltwobooml@naver.com

<sup>3</sup> Department of Energy Engineering, Hanyang University, Seoul 04763, Korea; jaeyoungb@daum.net

<sup>4</sup> UB Materials Inc., Yongin 17162, Korea; parkjinhyung@gmail.com

\* Correspondence: parkjgl@hanyang.ac.kr

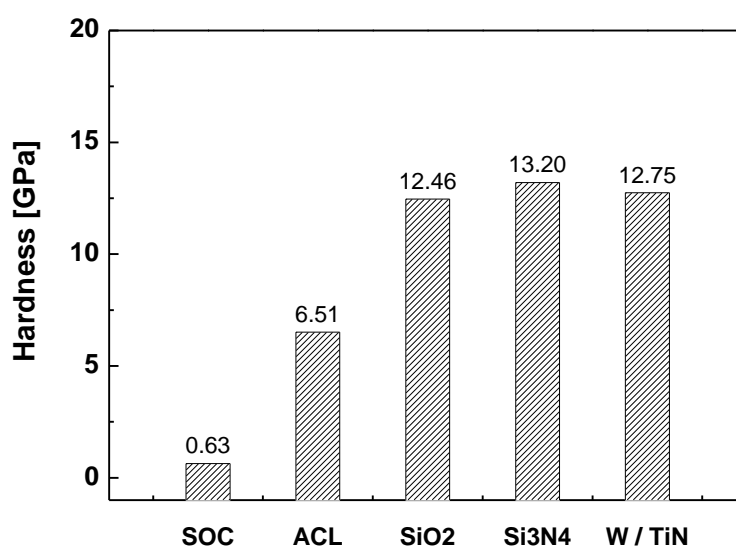

**Figure S1.** Dependencies of hardness on the film types. SOC and ACL are spin-on-carbon and amorphous carbon layer.

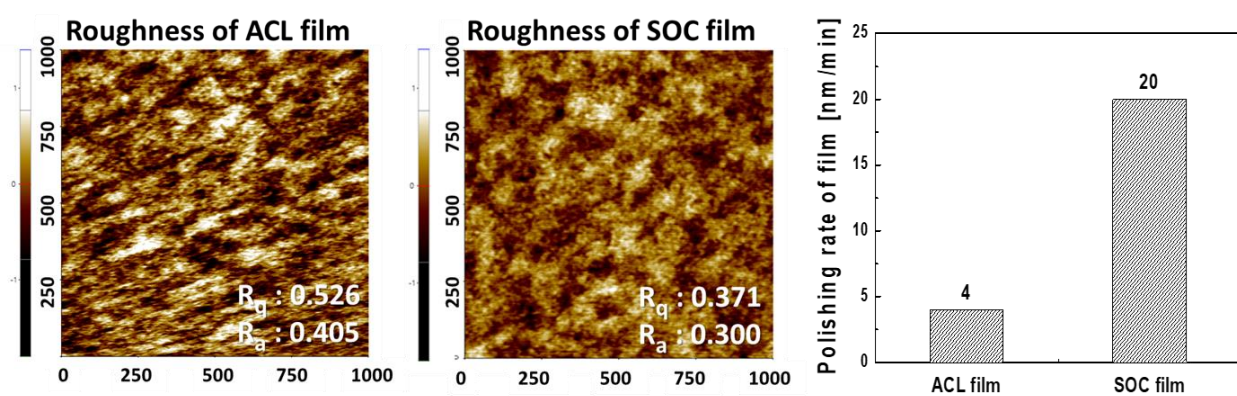

**Figure S2.** Roughness of the SOC and ACL film surface by using AFM (1  $\mu\text{m} \times 1 \mu\text{m}$  in scanning area).

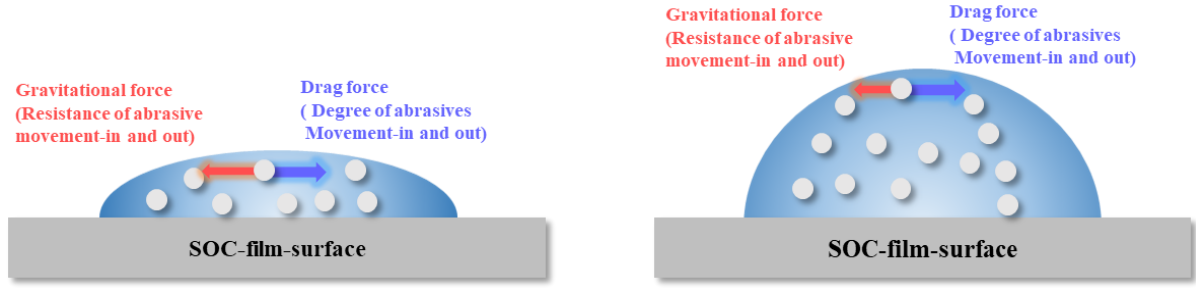

**Figure S3.** Stoke's law for the abrasive movement in the CMP slurry. The drag force ( $F_D$ ) due to the resistance of fluid and gravitational force( $F_m$ ) are defined by the equations (1) and (2).

$$F_D = C_D A \rho_f \left( \frac{v^2}{2} \right) = 3\pi d_d \eta v \quad (1)$$

$$F_m = \frac{\pi}{6} d^3 (\rho_s - \rho_f) g = \frac{\pi}{6} d_v^3 (\rho_s - \rho_f) g \quad (2)$$

$C_D$ ,  $A$ ,  $\rho_f$ ,  $d_d$ ,  $\eta$ ,  $\rho_s$ , and  $g$  are the drag coefficient depending on abrasive size, shape, velocity, the projected area of a abrasive perpendicular to direction of motion, the fluid density relative velocity of an abrasive in a fluid, the drag diameter, the fluid viscosity, the density of an abrasive, and the gravitational acceleration, respectively. Since  $A$  decreases with decreasing the contact angle (i.e., absorption degree: hydrophilicity) of the SOC-film-surface CMP slurry on the polished SOC-film-surface,  $F_D$  decreased with increasing the ferric catalyst concentration, resulting in a less the movement out and in of the  $ZrO_2$  abrasives on the CMP pad.

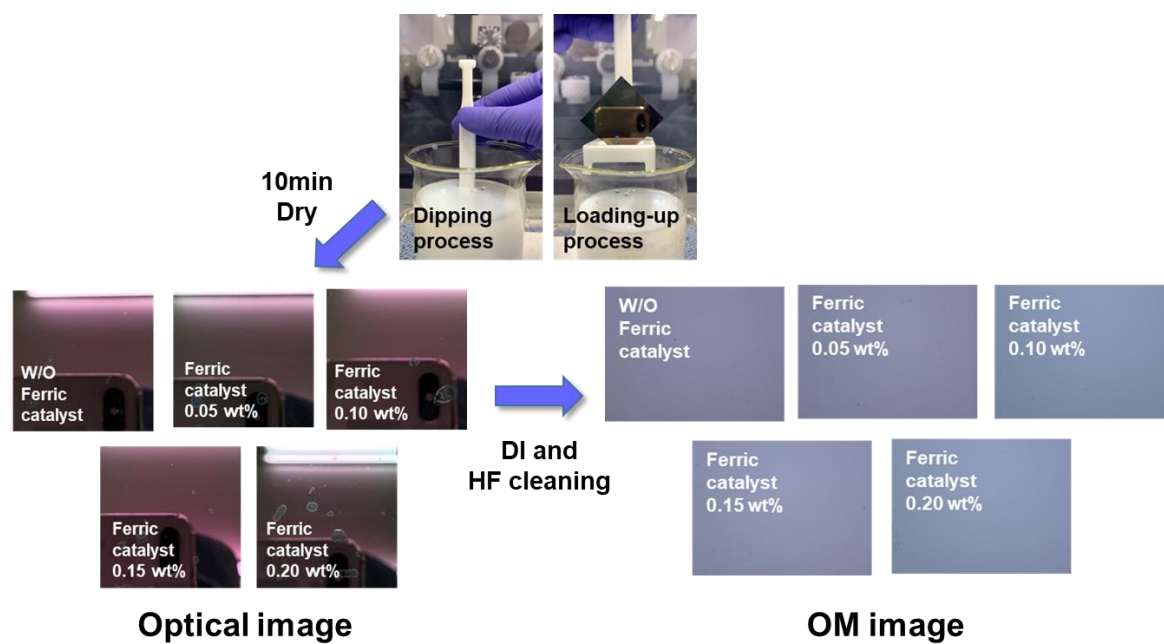

**Figure S4.** Adsorption degree (i.e., image of the SOC film after dipping and loading-up process and DI and HF cleaning) of the SOC film surface CMP on SOC film surface, depending on the ferric catalyst concentration.

**Table S1.** SOC film polishing rate depending on the types of iron-based catalysts.

| List                                                                                                                                          | Dissociated chemical species                                                                                                                                    | Initial pH<br>@1wt%<br>solution | Fe(OH) <sub>x</sub><br>precipitation<br>@pH 2.3 | SOC<br>Polishing rate<br>@3psi,30s |
|-----------------------------------------------------------------------------------------------------------------------------------------------|-----------------------------------------------------------------------------------------------------------------------------------------------------------------|---------------------------------|-------------------------------------------------|------------------------------------|
| Ammonium iron(III) citrate<br>(NH <sub>4</sub> ) <sub>5</sub> [Fe(C <sub>6</sub> H <sub>4</sub> O <sub>7</sub> ) <sub>2</sub> ]               | 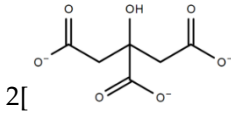<br>2[ ], Fe <sup>3+</sup> , 5NH <sub>4</sub> <sup>+</sup>                     | 5.94                            | X                                               | 829                                |
| Ammonium iron(III) oxalate trihydrate<br>(NH <sub>4</sub> ) <sub>3</sub> [Fe(C <sub>2</sub> O <sub>4</sub> ) <sub>3</sub> ].3H <sub>2</sub> O | <br>3[ ], Fe <sup>3+</sup> , 3NH <sub>4</sub> <sup>+</sup> , 3H <sub>2</sub> O | 5.32                            | X                                               | 787                                |
| Iron(III) sulfate hydrate<br>Fe <sub>2</sub> (SO <sub>4</sub> ) <sub>3</sub> .H <sub>2</sub> O                                                | <br>3[ ], 2Fe <sup>3+</sup> , H <sub>2</sub> O                                 | 2.63                            | X                                               | 2022                               |
| Propylenediamine tetra-acetic acid Iron(III)<br>C <sub>11</sub> H <sub>18</sub> N <sub>2</sub> O <sub>8</sub>                                 | <br>3[ ], 4Fe <sup>3+</sup> , H <sub>2</sub> O                                | 2.78                            | X                                               | 1814                               |
| Iron(III) nitrate enneahydrate<br>Fe(NO <sub>3</sub> ) <sub>3</sub> .9H <sub>2</sub> O                                                        | <br>3[ ], Fe <sup>3+</sup> , 9H <sub>2</sub> O                               | 2.43                            | X                                               | 1211                               |
| Potassium ferrocyanide<br>K <sub>4</sub> Fe(CN) <sub>6</sub>                                                                                  | <br>4K <sup>+</sup> , [ ] <sup>4-</sup>                                      | 6.81                            | X                                               | 808                                |

\*ALL SOC CMP slurries were titrated a pH of 2.3 by adding the titrant (i.e., HNO<sub>3</sub>)
